1 **Conservation and Divergence in the Asexual Sporulation Gene**  
2 **Regulatory Network Across a Genus of Filamentous Fungi**

3

4 **Ming-Yueh Wu<sup>a,b\*</sup>, Matthew E. Mead<sup>c</sup>, Mi-Kyung Lee<sup>d</sup>, Sun-Chang Kim<sup>e</sup>, Antonis**  
5 **Rokas<sup>c#</sup>, Jae-Hyuk Yu<sup>a,b#</sup>**

6

7 <sup>a</sup>Department of Bacteriology and Genetics, University of Wisconsin, Madison,

8 <sup>b</sup>Laboratory of Genetics, University of Wisconsin-Madison, Madison, Wisconsin, USA

9 <sup>c</sup>Department of Biological Sciences, Vanderbilt University, Nashville, Tennessee, USA

10 <sup>d</sup>Biological Resource Center, Korea Research Institute of Bioscience and Biotechnology

11 (KRIBB), Jeongeup-si, Republic of Korea

12 <sup>e</sup>Department of Biological Sciences, Korea Advanced Institute of Science and Technology,

13 Dae-Jon, Republic of Korea

14

15 Running Head: The WetA regulatory network in *Aspergillus* conidiation

16

17 #Address correspondence to Jae-Hyuk Yu, [jyu1@wisc.edu](mailto:jyu1@wisc.edu), and Antonis Rokas,

18 [antonis.rokas@vanderbilt.edu](mailto:antonis.rokas@vanderbilt.edu)

19 \*Present Address: Ming-Yueh Wu, Ginkgo BioWorks Inc., Boston, Massachusetts, USA

20 M-Y. W. and M.E.M. contributed equally to this work.

21 Word count: 4,908 words

22

## 23 **Abstract**

24 Asexual sporulation is fundamental to the ecology and lifestyle of filamentous fungi and can  
25 facilitate both plant and human infection. In *Aspergillus*, the production of asexual spores is  
26 primarily governed by the BrlA→AbaA→WetA regulatory cascade. The final step in this  
27 cascade is controlled by the WetA protein and not only governs the morphological  
28 differentiation of spores but also the production and deposition of diverse metabolites into  
29 spores. While WetA is conserved across the genus *Aspergillus*, the structure and degree of  
30 conservation of the *wetA* gene regulatory network (GRN) remains largely unknown. We carried  
31 out comparative transcriptome analyses between *wetA* null mutant and wild type asexual spores  
32 in three representative species spanning the diversity of the genus *Aspergillus*: *A. nidulans*, *A.*  
33 *flavus*, and *A. fumigatus*. We discovered that WetA regulates asexual sporulation in all three  
34 species via a negative feedback loop that represses BrlA, the cascade's first step. Furthermore,  
35 ChIP-seq experiments in *A. nidulans* asexual spores suggest that WetA is a DNA-binding  
36 protein that interacts with a novel regulatory motif. Several global regulators known to bridge  
37 spore production and the production of secondary metabolites show species-specific regulatory  
38 patterns in our data. These results suggest that the BrlA→AbaA→WetA cascade's regulatory  
39 role in cellular and chemical asexual spore development is functionally conserved, but that the  
40 *wetA*-associated GRN has diverged during *Aspergillus* evolution.

## 41 **Importance**

42 The formation of resilient spores is a key factor contributing to the survival and fitness of many  
43 microorganisms, including fungi. In the fungal genus *Aspergillus*, spore formation is controlled  
44 by a complex gene regulatory network that also impacts a variety of other processes, including  
45 secondary metabolism. To gain mechanistic insights into how fungal spore formation is  
46 controlled across *Aspergillus*, we dissected the gene regulatory network downstream of a major

47 regulator of spore maturation (WetA) in three species that span the diversity of the genus: the  
48 genetic model *A. nidulans*, the human pathogen *A. fumigatus*, and the aflatoxin producer *A.*  
49 *flavus*. Our data shows that WetA regulates asexual sporulation in all three species via a  
50 negative feedback loop and likely binds a novel regulatory element we term the WetA Response  
51 Element (WRE). These results shed light on how gene regulatory networks in microorganisms  
52 control important biological processes and evolve across diverse species.

## 53 **Introduction**

54 The ability to produce numerous asexual spores is one of the key factors contributing to the  
55 fecundity and fitness of filamentous fungi. Fungal asexual spores are highly efficient for  
56 genome protection, survival, and propagation. Spores are also the primary means of infecting  
57 host organisms for many pathogenic fungi (1). Importantly, in some filamentous fungi,  
58 morphological development is coordinated with the production of secondary metabolites with  
59 toxic and antibiotic properties (2–4).

60 Asexual development (conidiation) in the fungal class Eurotiomycetes results in the formation  
61 of mitotically derived asexual spores known as conidiospores or conidia. As asexual  
62 sporulation is widespread among fungi, it represents a simple, highly tractable system for  
63 understanding how gene regulatory networks (GRNs) evolve in microbial eukaryotes and how  
64 this evolution has influenced developmental and metabolic phenotypes.

65 Members of the genus *Aspergillus* are ubiquitous in most environments, and include various  
66 beneficial, pathogenic, and/or toxigenic species (5) All aspergilli produce conidia as the main  
67 means of dispersion and infection. Importantly, the asexual development and the production of  
68 certain secondary metabolites including mycotoxins are intimately associated (2).

69 The three distantly related species *Aspergillus nidulans*, *Aspergillus flavus*, and *Aspergillus*  
70 *fumigatus*, whose pairwise levels of genome similarity are similar to the genomic similarity  
71 between the human and fish genomes (6), form distinct conidiophores with varying sizes of

72 conidia. The regulatory mechanisms of conidiation have been extensively studied in *A.*  
73 *nidulans* (7–23). The regulatory genes can be divided into central regulators, upstream  
74 activators, negative regulators, light-dependent regulators, and the *velvet* regulators (24, 25).  
75 The central genetic regulatory cascade  $BrlA \rightarrow AbaA \rightarrow WetA$  is present in *Aspergillus* and  
76 governs both conidiation-specific GRNs and the resulting morphological pathway of  
77 conidiation (Fig 1A) (22, 24, 26). *BrlA* is a C<sub>2</sub>H<sub>2</sub>-zinc-finger type transcription factor (TF),  
78 which recognizes and interacts with *BrlA* Response Elements (BRE) (Fig 1B) (27, 28). The  
79 *brlA* gene is expressed in the early phase of conidiation and mediates vesicle formation and  
80 budding-like cell growth (11). The *abaA* gene is activated by *BrlA* and regulates the formation  
81 of metulae and phialides. Similar to *BrlA*, *AbaA* is a TF, containing an TEA/ATTS DNA  
82 binding motif and a potential leucine zipper that recognizes the *AbaA* Response Elements  
83 (AREs) (Fig 1B) (29). The *wetA* (*wet*-white A) gene, activated by *AbaA*, functions in the late  
84 phase of conidiation that completes sporogenesis. The  $BrlA \rightarrow AbaA \rightarrow WetA$  central regulatory  
85 cascade acts in concert with other genes to control conidiation-specific gene expression and  
86 determine the order of gene activation during the cellular and chemical development of spores.  
87 The *WetA* protein plays a pivotal role in the coordinated control of *Aspergillus* conidiogenesis;  
88 however, the precise molecular mechanisms of *WetA* function have been unknown. *WetA* is  
89 highly and broadly conserved in *Ascomycetes* (8, 10–13, 15–23, 26, 30), plays an essential role  
90 in the synthesis of crucial conidial wall components, and makes the conidia both impermeable  
91 and mature (20, 21, 30). The *Aspergillus* *WetA* proteins have a conserved ESC1/*WetA*-related  
92 domain (PTHR22934: SF23) with putative DNA-binding functions, a predicted transcription  
93 activation domain (TAD) (31), and a nuclear localization signal (NLS) (32, 33) near the C  
94 terminus (16, 34), suggesting that *WetA* is likely a DNA-binding TF (30) (Fig 1B). As  
95 summarized in Table 1, the deletion of *wetA* results in a plethora of conidial defects, including  
96 the formation of colorless conidia that undergo autolysis in *A. nidulans* (10–13, 20–22, 26), *A.*

97 *fumigatus* (8, 15), *A. oryzae* (18), and *A. flavus* (30). The metabolism and expression of several  
98 conidial components are perturbed in the  $\Delta wetA$  conidia, leading to reduced stress tolerance  
99 and spore viability (8, 30).

100 In this report, we have investigated the structure and degree of conservation of the  
101 BrlA $\rightarrow$ AbaA $\rightarrow$ WetA central regulatory cascade of *Aspergillus* conidiation and the broader  
102 *wetA* GRNs in three representative *Aspergillus* species: the genetic model *A. nidulans*, the  
103 mycotoxin producer *A. flavus*, and the human pathogen *A. fumigatus*. Specifically, we carried  
104 out comparative transcriptome analyses between *wetA* null mutant and wild type (WT) asexual  
105 spores in the three species. We also investigated the WetA-chromatin interaction in asexual  
106 spores via ChIP-seq in *A. nidulans* spores, which enabled us to identify the consensus WetA-  
107 DNA binding sequence. Further comparative genome-wide analyses revealed that the WetA-  
108 associated GRN has diverged during *Aspergillus* evolution, uncovering important yet  
109 unexplored regulatory networks of asexual sporulation and metabolic remodeling in  
110 *Aspergillus*. Our findings provide the first clear and systematic dissection of the evolutionarily  
111 conserved WetA developmental regulator governing the diverged processes of cellular  
112 differentiation, chemical development, and cell survival across a genus of filamentous fungi.

## 113 **Results**

### 114 **Conserved and diverged roles for WetA in the control of gene** 115 **expression in *Aspergilli***

116 To investigate the conserved and divergent regulatory roles WetA plays in the three *Aspergillus*  
117 species, we carried out comprehensive analyses of gene expression differences between the  
118 WT and *wetA* null mutant conidia. We found that WetA plays a broad regulatory role in conidia  
119 in all three *Aspergillus* species; approximately 52%, 57%, and 43% of all genes showed  
120 differential accumulation of mRNAs in the  $\Delta wetA$  conidia in comparison to WT conidia in *A.*

121 *nidulans*, *A. fumigatus*, and *A. flavus*, respectively (Table 2). Among the differentially  
122 expressed genes (DEGs), 46%, 48%, and 50% were underexpressed and 54%, 52%, and 50%  
123 were overexpressed in the  $\Delta wetA$  conidia compared to the WT conidia in *A. nidulans*, *A.*  
124 *fumigatus*, and *A. flavus*, respectively (Table 2).

125 Functional category analysis was carried out by determining Gene Ontology (GO) terms that  
126 were enriched in DEGs. Specifically, the biological process GO categories that were enriched  
127 in the  $\Delta wetA$  conidia included “asexual sporulation”, “secondary metabolic process”, and  
128 “toxin biosynthetic process”. Moreover, over 70% of all genes in the cellular component GO  
129 category, “fungal-type cell wall”, were also regulated in each species. These top enriched GO  
130 categories are consistent with the phenotypes of the  $\Delta wetA$  mutants, suggesting that WetA plays  
131 key a role in carbohydrate metabolism, secondary metabolism, and conidial wall integrity (30).

132 To explore the conserved and diverged regulatory roles of WetA, we examined the mRNA  
133 expression profiles of orthologous groups of genes (orthogroups) in the three *Aspergillus*  
134 genomes. In total, 8,978 orthogroups were identified and 6,466 of these contained orthologs in all  
135 three species. Of the 8,978 total orthogroups, 7,301 (81%) had at least one gene that showed  
136 differential expression in the  $\Delta wetA$  conidia, but only 1,294 orthogroups show consistent  
137 WetA-regulation (i.e., all orthologs in the group were either overexpressed or underexpressed).

138 The enriched GO categories of the 1,294 orthogroups whose genes showed the same  
139 differential expression pattern suggest that WetA is functionally conserved in controlling stress  
140 response, pigmentation, spore trehalose formation, cell wall organization, and cellular  
141 development, which are also consistent with the phenotypes observed in  $\Delta wetA$  strains. In  
142 contrast, the remaining 6,007 WetA-regulated orthogroups show divergent differential  
143 expression patterns, implying that a substantial portion of the WetA-controlled GRNs has  
144 functionally diverged among the three species. Furthermore, of the 6,466 *Aspergillus*  
145 orthogroups that contain orthologs in all three species, only 788 exhibited a conserved pattern

146 of differential expression (i.e., all genes were either overexpressed or underexpressed in the  
147  $\Delta wetA$  conidia in all three species) (Fig 2, Table S2).

148 **WetA-regulated genes involved in asexual development, signal**  
149 **transduction, and conidial integrity are divergently regulated**  
150 **among *Aspergilli***

151 To explore the conserved and diverged molecular roles of WetA in conidiation in the three  
152 species, we examined mRNA levels of genes related to asexual development, signal  
153 transduction, and conidial integrity (Fig 3 , Table S3), phenotypes previously implicated to be  
154 controlled by WetA (8, 10–13, 20–22, 26, 30, 37).

155 Our data show that WetA negatively regulates asexual development in conidia produced by  
156 species across the genus *Aspergillus* via a negative feedback loop that represses the pathway's  
157 upstream regulator, *brlA*. Specifically, both *brlA* and *abaA* expression are increased in the  
158  $\Delta wetA$  conidia relative to WT in all three species (Figure 4). However, to achieve the conserved  
159 repression of *brlA* and *abaA* mRNA accumulation, WetA shows species-specific regulatory  
160 effects on *brlA* upstream regulatory networks. For example, in the *velvet* protein family and  
161 complex, *vosA* was consistently underexpressed in the three  $\Delta wetA$  conidia, but the WetA  
162 effects on *veA*, *velB*, *velC*, and *laeA* expression are not conserved in each species. Similarly,  
163 the light-dependent regulators were differentially regulated by WetA. The blue-light-dependent  
164 regulators *lreA* and *lreB* were unaffected in the  $\Delta AflwetA$  conidia but repressed in both the  
165  $\Delta AniwetA$  and  $\Delta AfuwetA$  conidia. Taken together, the WetA-mediated feedback repression of  
166 asexual development is functionally conserved across the genus *Aspergillus* but the specific  
167 GRNs appear to have diverged during the evolution of the genus *Aspergillus*.

168 Our previous study showed that *AflWetA* is involved in regulating G-protein regulatory  
169 pathways (30). Expanding this analysis in the three *Aspergillus* species showed that *gprC*, *gprF*,

170 *gprG*, *nopA*, *flbA*, and *pkaA* were consistently differentially regulated in the  $\Delta wetA$  conidia,  
171 while other members in the G-protein regulatory pathways were either not affected by WetA or  
172 showed species-specific regulatory patterns in the  $\Delta wetA$  conidia (Table S4).

173 WetA is involved in other signal transduction pathways. Total 110, 126, and 92 kinase-encoded  
174 genes were differentially expressed in the  $\Delta AniwetA$ ,  $\Delta AfiwetA$ , and  $\Delta AflwetA$  conidia  
175 respectively; however, only 21 of them were consistently over- or underexpressed in the  $\Delta wetA$   
176 conidia of all three species (Table S5). Similarly, 132, 153, and 142 putative TF-encoded genes  
177 in each species were differentially expressed in  $\Delta AniwetA$ ,  $\Delta AfiwetA$ , and  $\Delta AflwetA$  conidia  
178 respectively; however, only 32 were consistently over- or underexpressed in all three of the  
179  $\Delta wetA$  conidia (Table S5).

180 We further investigated the mRNA levels of the genes in the secondary metabolite gene (SMG)  
181 clusters in each species (30, 38, 39) (Table S7). In total, 96% (64/67), 100% (33/33), and 92%  
182 (68/74) of SMG clusters in the  $\Delta AniwetA$ ,  $\Delta AfiwetA$ , and  $\Delta AflwetA$  conidia, respectively, had  
183 at least one gene that showed altered mRNA expression levels (Table 3). One of the SMG  
184 backbone genes, *wA*, is conserved in all three species and it encodes a polyketide synthase  
185 (PKS) necessary for the formation of a key conidial pigment (40). Previous studies showed that  
186 *wA* is activated by WetA (20), consistent with the colorless conidia phenotype of the  $\Delta wetA$   
187 mutants. Although *wA* was underexpressed in the  $\Delta AniwetA$  and  $\Delta AflwetA$  conidia as expected,  
188 it was overexpressed in  $\Delta AfiwetA$ , suggesting that the regulation of the conidial pigmentation  
189 pathway in *A. fumigatus* differs from that in the other two species.

190 Finally, we examined the expression levels of genes involved in conidia content and conidial  
191 wall integrity. Most of the DEGs associated with trehalose biosynthesis were underexpressed  
192 in the  $\Delta wetA$  conidia in all three species, while *treA*, involved in trehalose degradation, was  
193 overexpressed in the  $\Delta AniwetA$  and  $\Delta AfiwetA$  conidia but underexpressed in the  $\Delta AflwetA$



194 conidia (Fig 4). Loss of *wetA* resulted in overexpression of almost all genes involved in the  
195 biosynthesis of chitin and  $\beta$ -(1,3)-glucan, but genes involved in the biosynthesis and  
196 degradation of  $\alpha$ -(1,3)-glucan were both overexpressed and underexpressed relative to WT.  
197 (Fig 4).

198 Moreover, our results show that WetA is a key regulator of hydrophobins, DHN-melanin  
199 biosynthesis, and pyomelanin biosynthesis. Somewhat unexpectedly, although we observed the  
200 conserved “wet” and “white” phenotypes of the  $\Delta wetA$  conidia in all three species, all of the  
201 genes proposed to be related to the “wet” (hydrophobin) and “white” (DHN-melanin and  
202 pyomelanin) phenotypes were overexpressed in the  $\Delta Afu wetA$  conidia (Fig 5).

### 203 **Identification of WetA response elements (WREs)**

204 To better understand WetA regulatory mechanisms in conidia, we carried out chromatin  
205 immunoprecipitation (ChIP) experiments, followed by high-throughput sequencing of the  
206 enriched DNA fragments (ChIP-seq) in the *A. nidulans* conidia. We identified 157 peaks from  
207 two independent ChIP-seq experiments, using a False Discovery Rate (FDR) cutoff of less than  
208 or equal to 0.001 and a Fold Change (FC, sample tag counts divided by input tag counts) cutoff  
209 greater than or equal to 2. Of the 157 peaks, 135 were located in at least one of the following:  
210 a protein coding region, an intron, an upstream region, or a downstream region (Table S8).  
211 Upstream and downstream regions were defined as locations within 1.5 kb of the translation  
212 start or stop site, respectively. Many peaks were located within multiple features due to the  
213 condensed nature of the *A. nidulans* genome; therefore, 212 genes were considered “peak-  
214 associated”. Only a few peaks were located within protein coding regions (18) or introns (5);  
215 however, 105 peaks were in upstream regions and 59 peaks were in downstream regions. Of  
216 the 212 peak-associated genes, 139 showed differential expression in the *A. nidulans* RNA-seq  
217 dataset. Multiple previously described genes are in the list of peak-associated genes, including  
218 *flbA*, *mtfA*, *nopA*, *velB*, *sfaD*, *wetA*, *vosA*, *hsp70*, *srbA*, and *tpsA* (Table S8).

219 A putative WRE was predicted by MEME-ChIP (41). The 100 bp surrounding the summits of  
220 all peaks was used as input for the MEME-ChIP analysis. The only statistically significant  
221 motif identified (E-value =  $8.8e-8$ ) was 5'-CCGYTTGCGGC-3' and it exists in the upstream  
222 region of *AniwetA*. Potential *AniWetA*-recognized regions were identified by searching for the  
223 predicted motif in the upstream regions of ORFs in the *A. nidulans* genome with FIMO (42).  
224 In total, 2,217 genes were predicted to contain the WRE within their upstream regions in *A.*  
225 *nidulans* (Table S9). Functional analysis shows that many biological processes were enriched  
226 in these potential *AniWetA* targeted genes, including “trehalose metabolic process” and “cell  
227 wall mannoprotein biosynthetic process”, consistent with what is known about WetA function  
228 in conidiation.

229 To investigate the expression profile of potential *AniWetA* target genes in conidia, data from  
230 the transcriptomic analysis was utilized. In total, 1,176 WRE-containing genes were  
231 differentially expressed in *A. nidulans*, including 2 G-protein signaling pathway-associated  
232 genes, 22 conidial integrity-associated genes, 14 putative kinase-encoding genes, 22 putative  
233 transcription factor-encoding genes, 5 SMG backbone genes, and 11 asexual development-  
234 associated genes (Table 4).

235 Since the *Aspergillus* WetA proteins have a highly conserved putative DNA-binding domain  
236 and have conserved functions in the overall conidiation process, we hypothesized that *AfuWetA*  
237 and *AflWetA* recognize a similar *AniWetA* WRE. To test our hypothesis, we searched the  
238 *AniWetA* WRE in the *A. fumigatus* and *A. flavus* genomes and summarized the results in Fig 6.  
239 Only 15 genes, including *wetA*, that contain a WRE in their upstream 1.5 kb regions in all three  
240 species also exhibit consistent differential expression (Table 5). We further searched for WRE  
241 occurrences in the 1.5 kb sequence upstream of other *wetA* orthologs in different *Aspergillus*  
242 and other fungal species and found that the WRE in the upstream region of *wetA* genes is  
243 completely conserved throughout the family Aspergillaceae (Fig 7).

244 Taken together, we conclude that WetA regulates the *Aspergillus* conidial transcriptomes  
245 through both direct and indirect methods and controls species-specific GRNs to achieve  
246 conserved and diverged functions.

## 247 **Discussion**

248 While WetA is well known as the key regulator of multiple cellular and chemical  
249 developmental processes in Ascomycetes (7, 8, 17–23, 30, 9–16), the regulatory mechanisms  
250 behind it employs are not known. In this study, we investigated the roles of WetA-mediated  
251 GRNs in the model organism *A. nidulans*, the human pathogen *A. fumigatus*, and the aflatoxin  
252 producer *A. flavus* and further identified a potential WetA binding motif in *A. nidulans*.

253 Previous studies suggested that *AniWetA* is required for activating a set of genes whose  
254 products comprise, or direct the assembly of, the conidial wall layers and also ensure proper  
255 cytoplasmic metabolic remodeling including massive trehalose biogenesis (20, 22, 43). We also  
256 reported that *AflWetA* is involved in the regulation of conidial secondary metabolism and  
257 hypothesized that this was done by WetA controlling a group of TFs and signaling pathways  
258 (30). Our RNA-seq results here show that 52%, 57%, and 43% of *A. nidulans*, *A. fumigatus*,  
259 and *A. flavus* transcriptomes were differentially regulated in the  $\Delta wetA$  conidia respectively,  
260 suggesting a broad regulatory role for WetA in aspergilli (Table 2, Fig 6). While *AniWetA*,  
261 *AfuWetA*, and *AflWetA* are functionally conserved in many aspects of developmental  
262 processes in conidia, the specific genes regulated by WetA are divergent in each species.  
263 Although WetA regulates a large number of common orthogroups in aspergilli, only 9% of  
264 *Aspergillus* orthogroups were consistently all over- or underexpressed in  $\Delta wetA$  conidia from  
265 the three species, suggesting that while the WetA-mediated regulation is functionally conserved,  
266 the WetA-mediated GRNs have been highly rewired (Fig 8).

267 An example of a divergent WetA-mediated GRN whose output is the conserved regulation of

268 a biological process is *Aspergillus* asexual development (Fig 3). In all three species, loss of  
269 *wetA* leads to increased levels of the central regulator *brlA* in conidia and shuts down asexual  
270 development. However, the set of regulatory events that result in WetA-mediated repression of  
271 *brlA* are unique to each species (Fig 3).

272 Although WetA shows broad regulatory effects in *Aspergillus* species, only 15 genes with the  
273 WRE in their upstream regions were consistently under- or overexpressed in the  $\Delta wetA$  conidia.  
274 The list of peak-associated genes in *A. nidulans* includes *wetA* and the important developmental  
275 regulators *vosA* and *velB*, suggesting that these genes may play crucial roles in conidiation and  
276 thus be conserved during evolution. VosA and VelB are both members of the *velvet* family of  
277 proteins (44–46). Moreover, the VosA-VelB complex is a crucial functional unit controlling  
278 conidia maturation (45–47). Loss of *vosA* causes some phenotypes similar to those by the loss  
279 of *wetA*, like a reduction in trehalose amount (48), suggesting that part of the WetA-mediated  
280 GRN may be controlled by regulating VosA. Previous studies show that *AniWetA* contains an  
281 *AniVosA* binding motif in its upstream 2 kb region (44), implicating the cross feedback  
282 regulation of WetA by VosA. Taken together, the WetA-mediated regulatory pathway may  
283 cross-talk with the *velvet* regulatory pathways via the cooperative activity of WetA/VosA/VelB.

284 We further examined the WetA-mediated GRNs controlling other pathways based on  
285 previously characterized, conserved WetA functions. First, we analyzed genes involved in  
286 conidial integrity for their WetA-regulation. The genes associated with trehalose biosynthesis  
287 are almost all underexpressed in all three of the  $\Delta wetA$  conidia (Fig 4). Similarly, almost all the  
288 genes associated with  $\beta$ -(1,3)-glucan biosynthesis were overexpressed in all three of the  $\Delta wetA$   
289 conidia (Fig 4). These results explain the dramatically reduced amount of trehalose and  
290 increased content of  $\beta$ -(1,3)-glucan in the  $\Delta wetA$  conidia (8, 30) and suggest a conserved WetA-  
291 mediated GRN for activation of trehalose biogenesis and repression of  $\beta$ -(1,3)-glucan

292 biosynthesis. WetA's function is likely diverged in  $\alpha$ -(1,3)-glucan metabolism. *AniWetA*  
293 upregulates the  $\alpha$ -(1,3)-glucan synthase *Aniags2* but downregulates all the genes associated  
294 with  $\alpha$ -(1,3)-glucan degradation except AN1604 (Fig 4). In contrast, *AfuWetA* downregulates  
295 all the  $\alpha$ -(1,3)-glucan synthases (*Afuags1*, *Afuags2*, and *Afuags3*), but has mixed effects on the  
296 genes associated with  $\alpha$ -(1,3)-glucan degradation in conidia (Fig 4). In conidia, *AflWetA* shows  
297 mixed effects on both the genes associated with  $\alpha$ -(1,3)-glucan biosynthesis and degradation  
298 (Fig 4).

299 WetA is involved in the regulation of hydrophobin expression. Only one of the five  
300 hydrophobin-encoding genes in *A. nidulans* was not differentially expressed in the  $\Delta wetA$   
301 conidia, and only *AnidewA* was underexpressed (Fig 5). In *A. fumigatus*, all six hydrophobin-  
302 encoding genes were overexpressed in the  $\Delta wetA$  conidia (Fig 5). In *A. flavus*, three of five  
303 hydrophobin-encoding genes were underexpressed in the  $\Delta wetA$  conidia, one of them was not  
304 regulated, and only *AflrodA* was up-regulated (Fig 5). Since the loss of *wetA* causes lower  
305 hydrophobicity of conidia, there might be other unidentified hydrophobins controlled by  
306 *AfuWetA*.

307 *AfuWetA* is diverged relative to *AniWetA* and *AflWetA* in its regulation of melanin biosynthesis.  
308 A previous study showed that *wA*, the first regulator in the DHN-melanin synthesis pathway, is  
309 activated by WetA in *A. nidulans* conidia (20, 49). Our RNA-seq analyses have revealed that  
310 both *AniwA* and *AflwA* were underexpressed in the  $\Delta AniwetA$  and  $\Delta AflwetA$  conidia (Fig 5).  
311 Moreover, *Aflayg1*, the second gene in the DHN-melanin pathway (50) was underexpressed in  
312 the  $\Delta AflwetA$  conidia (Fig 5). Surprisingly, although the  $\Delta AfuwetA$  conidia are colorless, all the  
313 DEGs associated with both DHN-melanin and pyomelanin biosynthesis were overexpressed in  
314 the  $\Delta AflwetA$  conidia (Fig 5), suggesting the melanin biosynthesis pathway in *A. fumigatus* may  
315 have uniquely evolved.

316 We identified a potential WRE (5'-CCGYTTGCGGC-3'), which is highly similar to the  
317 *Saccharomyces cerevisiae* Ixr1, Dal81, and Leu3 motifs (51–53). Although 53% of genes in  
318 the *A. nidulans* genome were differentially regulated in the  $\Delta AniwetA$  conidia, only 21% of  
319 them contain a WRE in their upstream 1.5 kb regions (Fig 6), suggesting that *AniWetA* might  
320 serve as a conserved regulatory hub which controls a group of regulators of various biological  
321 processes. Our data support a model where the *WetA*-mediated regulation is carried out via  
322 both direct and indirect interactions to control a downstream cascade of genes (Figure 9). We  
323 also scanned the *A. fumigatus* and *A. flavus* genomes for instances of the WRE and found that,  
324 while similar numbers of genes contained the WRE compared to *A. nidulans*, the makeup of  
325 that list of genes was different.

326 In conclusion, our studies provide the first clear and systematic dissection of *WetA*, an  
327 evolutionarily and functionally conserved regulator of morphological and chemical  
328 development of filamentous fungal conidiation. Moreover, we have revealed the molecular  
329 mechanisms of *WetA* as a DNA-binding, multi-functional regulator governing the diverged  
330 processes of cellular differentiation, chemical development, and cell survival across a genus of  
331 filamentous fungi, which advances our knowledge of spore formation in pathogenic and  
332 toxigenic fungi.

## 333 **Materials and methods**

### 334 **Strains, media, and culture conditions**

335 All strains used in this study are listed in Table S1. The fungal strains were grown on minimal  
336 medium (MM) with appropriate supplements as described (48, 54), and incubated at 37°C (*A.*  
337 *nidulans* and *A. fumigatus*), or 30°C (*A. flavus*). For liquid cultures, conidia were inoculated in  
338 liquid MM and incubated at 37°C or 30°C, 220 rpm. Conidiation induction was performed as  
339 described (55).

## 340 **Generation of *wetA* deletion and complemented strains**

341 We generated the deletion ( $\Delta$ ) and complement ( $C'$ ) strains of *wetA* in *A. nidulans* (*AniwetA*).  
342 The oligonucleotides used in this study are listed in Table S1. Briefly, the deletion construct  
343 containing *A. fumigatus pyrG* marker with 5' and 3' flanking regions of *AniwetA* were  
344 introduced into the recipient strain RJMP1.59 (56). To generate complemented strains, a WT  
345 *AniwetA* gene region, including its 2 kb upstream region, was cloned to pHS13 (45). The  
346 resulting plasmid pMY1 was then introduced into the recipient  $\Delta$ *AniwetA* strain TMY3,  
347 resulting in isolation of TMY4. Multiple  $\Delta$ *AniwetA* strains were generated and all behaved the  
348 same in every assay. Multiple  $C'$  *AniwetA* strains were generated and all behaved identically to  
349 one another as well. The  $\Delta$ *AfuwetA* (TSGw4),  $\Delta$ *AflwetA* (TMY1), and  $C'$ *AflwetA* (TMY2)  
350 strains were generated in previous studies (8, 30).

## 351 **Nucleic acid manipulation**

352 The genomic DNA and total RNA isolation for Northern blot analyses was performed as  
353 described (55, 57, 58). For RNA-seq and ChIP-seq, fresh conidia from 2-day-old solid cultures  
354 grown at 37°C or 30°C of WT and  $\Delta$ *wetA* strains were harvested.

## 355 **RNA sequencing**

356 Total RNA from 4 *A. nidulans* biological replicates, 3 *A. flavus* biological replicates, and 3 *A.*  
357 *fumigatus* biological replicates was extracted and submitted to ProteinCT Biotechnologies  
358 (Madison, WI) and the University of Wisconsin Gene Expression Center (Madison, WI) for  
359 library preparation and sequencing. For each replicate, a strand-specific library was prepared  
360 from total RNA using the Illumina TruSeq Strand-specific RNA sample preparation system.  
361 All replicates' libraries were sequenced (PE100bp for *A. nidulans* and SE100bp for *A.*  
362 *fumigatus* and *A. flavus*) using the Illumina HiSeq2500.

363 The *A. flavus* expression data were analyzed as previously reported (30). The following

364 analyses were carried out for the *A. fumigatus* and *A. nidulans* data. The overall quality of the  
365 raw sequence reads was verified using version 0.11.5 of FastQC (59). The genomes and  
366 annotation were downloaded from FungiDB and used for mapping (60). Mapping of the raw  
367 sequence reads to the genome was carried out with version 2.1.1 of Tophat2 (61), and the  
368 default settings were used except that the max intron length was set to 4,000 bases. The  
369 alignment files were compared against the gene annotation file, and raw counts for the number  
370 of reads mapping to each gene were generated using version 0.6.1p1 of HTSeq-count (62).  
371 Differential expression analysis of the raw counts was carried out using version 1.14.1 of  
372 DESeq2 (63). Genes were considered differentially expressed between the WT and  $\Delta wetA$   
373 conidia if their adjusted p-value was less than 0.05 and their  $\log_2$  fold-change was smaller than  
374 -1 or greater than 1. All RNA-seq data files are available from the NCBI Gene Expression  
375 Omnibus database (*A. nidulans* and *A. fumigatus*: GSE114143; *A. flavus*: GSE95711).

## 376 **Functional Enrichment and Orthogroup identification**

377 Gene Ontology enrichment analyses were carried out using the tool available at FungiDB (60).  
378 Unless otherwise stated, default settings were used in FungiDB, and redundant terms were  
379 collapsed with the REVIGO tool (64) using the “Tiny” setting for allowed similarity.  
380 Orthologs were identified using OrthoMCL with the settings: p-value cutoff of  $6e-6$ , percent  
381 identity cut-off of 30%, percent match cut-off of 70%, MCL inflation value of 2, and Maximum  
382 weight allowed of 180.

## 383 **Chromatin immunoprecipitation sequencing (ChIP-seq)**

384 ChIP assays were performed using MAGnify ChIP assays (Invitrogen) according to the  
385 manufacturer's instructions. Briefly,  $10^9$  of *A. nidulans* WT conidia were cross-linked with 1%  
386 formaldehyde, lysed and broken as described (65). Cell lysates were sonicated to shear DNA  
387 to 300-500 bp and were immunoprecipitated with the rabbit anti-WetA polyclonal antibodies  
388 (GenScript, NJ). Two experiments were performed, each with biological triplicates. In the first



389 experiment, 10% of the supernatants was kept as an input control (input represents PCR  
390 amplification of the total sample) and compared to the ChIP sample. In the second experiment,  
391 the ChIP sample from the WT strain was compared to the ChIP sample from the  $\Delta wetA$  strain.  
392 ChIP DNA samples were sent for ChIP-Seq service (ProteinCT, WI). Libraries were prepared  
393 using the TruSeq ChIP Library Preparation Kit (Illumina, CA) and sequenced on a HiSeq2500  
394 with single reads of 50 bp. Approximately 8-30 M reads were achieved per replicate.  
395 ChIP-seq reads were first trimmed using version 0.36 of the Trimmomatic software (66) and  
396 then version 0.7.15 of the BWA-MEM software (67) was used to map reads to the *A. nidulans*  
397 (FGSC A4) genome. Reads with any of the following flags were removed: unmapped,  
398 secondary alignment, or supplementary mapped read. Reads with a mapping quality (MAPQ)  
399 score of 0 were also removed. Duplicate reads were removed and samples were pooled using  
400 version 1.3 of the SAMtools software (68). Version 2.1.1.20160309 of the MACS2 software  
401 (69) with the settings -g 2.93e7 -s 101 --nomodel --extsize was used to call peaks. Extension  
402 sizes were calculated using SPP (70, 71). Peaks that exhibited a fold-change greater than 2 and  
403 a q-value less than 0.001 were used in further analyses. Peak lists were combined from each of  
404 the ChIP experiments. The ChIP-seq data is available from the NCBI Gene Expression  
405 Omnibus database (GSE114141).

## 406 **Motif discovery analyses**

407 To discover the WetA-Response Element (WRE), 100 bp of sequence surrounding the summits  
408 of the 157 combined peaks were pulled from the *A. nidulans* genome using the bedtools  
409 software, version 2.26.0 (72) and submitted to the MEME-ChIP software, version 4.12.0 (41).  
410 MEME was instructed to search for 10 motifs, 5-21 bp in length; all other settings were left at  
411 default. Instances of the WRE were identified in the upstream regions (1.5 kb upstream of the  
412 translation start) of all genes in the three *Aspergillus* genomes using the FIMO software (42)  
413 with a p-value cutoff of 5e-5.

## 414 References

- 415 1. Ebbole DJ. 2010. The Conidium, p. 577–590. *In* Cellular and Molecular Biology of  
416 Filamentous Fungi. American Society of Microbiology.
- 417 2. Calvo AM, Wilson RA, Bok JW, Keller NP. 2002. Relationship between secondary  
418 metabolism and fungal development. *Microbiol Mol Biol Rev* 66:447–459.
- 419 3. Yu J-H, Keller NP. 2005. Regulation of secondary metabolism in filamentous fungi.  
420 *Annu Rev Phytopathol* 43:437–458.
- 421 4. Bennett JW, Klich MA. 1992. *Aspergillus*: biology and industrial applications.  
422 Butterworth-Heinemann Boston.
- 423 5. Alshannaq A, Yu J-H. 2017. Occurrence, toxicity, and analysis of major mycotoxins in  
424 food. *Int J Environ Res Public Health* 14:632.
- 425 6. Fedorova ND, Khaldi N, Joardar VS, Maiti R, Amedeo P, Anderson MJ, Crabtree J,  
426 Silva JC, Badger JH, Albarraq A, Angiuoli S, Bussey H, Bowyer P, Cotty PJ, Dyer PS,  
427 Egan A, Galens K, Fraser-Liggett CM, Haas BJ, Inman JM, Kent R, Lemieux S,  
428 Malavazi I, Orvis J, Roemer T, Ronning CM, Sundaram JP, Sutton G, Turner G,  
429 Venter JC, White OR, Whitty BR, Youngman P, Wolfe KH, Goldman GH, Wortman  
430 JR, Jiang B, Denning DW, Nierman WC. 2008. Genomic islands in the pathogenic  
431 filamentous fungus *Aspergillus fumigatus*. *PLoS Genet* 4:e1000046.
- 432 7. Timberlake WE, Boylan MT, Mirabito PM, Willett CE, Zimmerman CR. 1987.  
433 Isolation and physical characterization of three essential conidiation genes from  
434 *Aspergillus nidulans*. *Antonie Van Leeuwenhoek* 53:317.
- 435 8. Tao L, Yu J-H. 2011. AbaA and WetA govern distinct stages of *Aspergillus fumigatus*  
436 development. *Microbiology* 157:313–326.
- 437 9. Desjardins CA, Champion MD, Holder JW, Muszewska A, Goldberg J, Bailão AM,  
438 Brigido MM, Ferreira ME, Garcia AM, Grynberg M, Gujja S, Heiman DI, Henn MR,  
439 Kodira CD, León-Narváez H, Longo LV, Ma LJ, Malavazi I, Matsuo AL, Morais FV,  
440 Pereira M, Rodríguez-Brito S, Sakthikumar S, Salem-Izacc SM, Sykes SM, Teixeira  
441 MM, Vallejo MC, Walter ME, Yandava C, Young S, Zeng Q, Zucker J, Felipe MS,  
442 Goldman GH, Haas BJ, McEwen JG, Nino-Vega G, Puccia R, San-Blas G, Soares  
443 CM, Birren BW, Cuomo CA 2011. Comparative genomic analysis of human fungal  
444 pathogens causing paracoccidioidomycosis. *PLoS Genet* 7:e1002345.
- 445 10. Martinelli SD, Clutterbuck AJ. 1971. A quantitative survey of conidiation mutants in  
446 *Aspergillus nidulans*. *J Gen Microbiol* 69:261–268.
- 447 11. Adams TH, Boylan MT, Timberlake WE. 1988. *brlA* is necessary and sufficient to  
448 direct conidiophore development in *Aspergillus nidulans*. *Cell* 54:353–362.
- 449 12. Timberlake WE. 1993. Translational triggering and feedback fixation in the control of  
450 fungal development. *Plant Cell* 5:1453.

- 451 13. Sewall TC. 1994. Cellular effects of misscheduled *brlA*, *abaA*, and *wetA* expression in  
452 *Aspergillus nidulans*. *Can J Microbiol* 40:1035–1042.
- 453 14. Clutterbuck AJ. 1969. A mutational analysis of conidial development in *Aspergillus*  
454 *nidulans*. *Genetics* 63:317–327.
- 455 15. Shin K-S, Kim YH, Yu J-H. 2015. Proteomic analyses reveal the key roles of BrlA and  
456 AbaA in biogenesis of gliotoxin in *Aspergillus fumigatus*. *Biochem Biophys Res*  
457 *Commun* 463:428–433.
- 458 16. Son H, Kim M-G, Min K, Lim JY, Choi GJ, Kim J-C, Chae S-K, Lee Y-W. 2014.  
459 WetA is required for conidiogenesis and conidium maturation in the ascomycete  
460 fungus *Fusarium graminearum*. *Eukaryot Cell* 13:87–98.
- 461 17. Wang M, Sun X, Zhu C, Xu Q, Ruan R, Yu D, Li H. 2015. *PdbrlA*, *PdabaA* and  
462 *PdwetA* control distinct stages of conidiogenesis in *Penicillium digitatum*. *Res*  
463 *Microbiol* 166:56–65.
- 464 18. Ogawa M, Tokuoka M, Jin FJ, Takahashi T, Koyama Y. 2010. Genetic analysis of  
465 conidiation regulatory pathways in koji-mold *Aspergillus oryzae*. *Fungal Genet Biol*  
466 47:10–18.
- 467 19. Li F, Shi H-Q, Ying S-H, Feng M-G. 2015. WetA and VosA are distinct regulators of  
468 conidiation capacity, conidial quality, and biological control potential of a fungal  
469 insect pathogen. *Appl Microbiol Biotechnol* 99:10069–10081.
- 470 20. Marshall MA, Timberlake WE. 1991. *Aspergillus nidulans wetA* activates spore-  
471 specific gene expression. *Mol Cell Biol* 11:55–62.
- 472 21. Sewall TC, Mims CW, Timberlake WE. 1990. Conidium differentiation in *Aspergillus*  
473 *nidulans* wild-type and *wetA* mutant strains. *Dev Biol* 138:499–508.
- 474 22. Mirabito PM, Adams TH, Timberlake WE. 1989. Interactions of three sequentially  
475 expressed genes control temporal and spatial specificity in *Aspergillus* development.  
476 *Cell* 57:859–868.
- 477 23. Prade RA, Timberlake WE. 1994. The *Penicillium chrysogenum* and *Aspergillus*  
478 *nidulans wetA* developmental regulatory genes are functionally equivalent. *Mol Gen*  
479 *Genet* 244:539–47.
- 480 24. de Vries RP, Riley R, Wiebenga A, Aguilar-Osorio G, Amillis S, Uchima CA,  
481 Anderluh G, Asadollahi M, Askin M, Barry K, Battaglia E, Bayram Ö, Benocci T,  
482 Braus-Stromeyer SA, Caldana C, Cánovas D, Cerqueira GC, Chen F, Chen W, Choi C,  
483 Clum A, Dos Santos RA, Damásio AR, Diallinas G, Emri T, Fekete E, Flipphi M,  
484 Freyberg S, Gallo A, Gournas C, Habgood R, Hainaut M, Harispe ML, Henrissat B,  
485 Hildén KS, Hope R Hossain A, Karabika E, Karaffa L, Karányi Z, Kraševc N, Kuo A,  
486 Kusch H, LaButti K, Legendijk EL, Lapidus A, Lévassieur A, Lindquist E, Lipzen A,  
487 Logrieco AF, MacCabe A, Mäkelä MR, Malavazi I, Melin P, Meyer V, Mielnichuk N,  
488 Miskei M, Molnár ÁP, Mulé G, Ngan CY, Orejas M, Orosz E, Ouedraogo JP,

- 489 Overkamp KM, Park HS, Perrone G, Piumi F, Punt PJ, Ram AF, Ramón A, Rauscher  
490 S, Record E, Riaño-Pachón DM, Robert V, Röhrig J, Ruller R, Salamov A, Salih NS,  
491 Samson RA, Sándor E, Sanguinetti M, Schütze T, Sepčić K, Shelest E, Sherlock G,  
492 Sophianopoulou V, Squina FM, Sun H, Susca A, Todd RB, Tsang A, Unkles SE, van  
493 de Wiele N, van Rossen-Uffink D, Oliveira JV, Vesth TC, Visser J, Yu JH, Zhou M,  
494 Andersen MR, Archer DB, Baker SE, Benoit I, Brakhage AA, Braus GH, Fischer R,  
495 Frisvad JC, Goldman GH, Houburken J, Oakley B, Pócsi I, Scazzocchio C, Seiboth B,  
496 vanKuyk PA, Wortman J, Dyer PS, Grigoriev IV. 2017. Comparative genomics  
497 reveals high biological diversity and specific adaptations in the industrially and  
498 medically important fungal genus *Aspergillus*. *Genome Biol* 18:28.
- 499 25. Park H-S, Yu J-H. 2012. Genetic control of asexual sporulation in filamentous fungi.  
500 *Curr Opin Microbiol* 15:669–677.
- 501 26. Boylan MT, Mirabito PM, Willett CE, Zimmerman CR, Timberlake WE. 1987.  
502 Isolation and physical characterization of three essential conidiation genes from  
503 *Aspergillus nidulans*. *Mol Cell Biol* 7:3113–3118.
- 504 27. Chang YC, Timberlake WE. 1993. Identification of *Aspergillus brlA* response  
505 elements (BREs) by genetic selection in yeast. *Genetics* 133:29–38.
- 506 28. Adams TH, Timberlake WE. 1990. Upstream elements repress premature expression  
507 of an *Aspergillus* developmental regulatory gene. *Mol Cell Biol* 10:4912–4919.
- 508 29. Andrianopoulos A, Timberlake WE. 1994. The *Aspergillus nidulans abaA* gene  
509 encodes a transcriptional activator that acts as a genetic switch to control development.  
510 *Mol Cell Biol* 14:2503–2515.
- 511 30. Wu M-Y, Mead ME, Kim S-C, Rokas A, Yu J-H. 2017. WetA bridges cellular and  
512 chemical development in *Aspergillus flavus*. *PLoS One* 12:e0179571.
- 513 31. Piskacek S, Gregor M, Nemethova M, Grabner M, Kovarik P, Piskacek M. 2007.  
514 Nine-amino-acid transactivation domain: Establishment and prediction utilities.  
515 *Genomics* 89:756–768.
- 516 32. Nguyen BaAN, Pogoutse A, Provarnt N. 2009. NLStradamus: a simple Hidden Markov  
517 Model for nuclear localization signal prediction. *BMC Bioinformatics* 10:202.
- 518 33. Horton P, Park K-J, Obayashi T, Fujita N, Harada H, Adams-Collier CJ, Nakai K.  
519 2007. WoLF PSORT: protein localization predictor. *Nucleic Acids Res* 35:W585–  
520 W587.
- 521 34. Mi H, Dong Q, Muruganujan A, Gaudet P, Lewis S, Thomas PD. 2010. PANTHER  
522 version 7: improved phylogenetic trees, orthologs and collaboration with the Gene  
523 Ontology Consortium. *Nucleic Acids Res* 38:D204–D210.
- 524 35. Altschul SF, Madden TL, Schäffer AA, Zhang J, Zhang Z, Miller W, Lipman DJ.  
525 1997. Gapped BLAST and PSI-BLAST: a new generation of protein database search  
526 programs. *Nucleic Acids Res* 25:3389–402.

- 527 36. Thomas PD, Campbell MJ, Kejariwal A, Mi H, Karlak B, Daverman R, Diemer K,  
528 Muruganujan A, Narechania A. 2003. PANTHER: a library of protein families and  
529 subfamilies indexed by function. *Genome Res* 13:2129–41.
- 530 37. Sewall TC, Mims CW, Timberlake WE. 1990. *abaA* controls phialide differentiation in  
531 *Aspergillus nidulans*. *Plant Cell Online* 2:731–739.
- 532 38. Inglis DO, Binkley J, Skrzypek MS, Arnaud MB, Cerqueira GC, Shah P, Wymore F,  
533 Wortman JR, Sherlock G. 2013. Comprehensive annotation of secondary metabolite  
534 biosynthetic genes and gene clusters of *Aspergillus nidulans*, *A. fumigatus*, *A. niger*  
535 and *A. oryzae*. *BMC Microbiol* 13:91.
- 536 39. Lind AL, Wisecaver J H, Lameiras C, Wiemann P, Palmer JM, Keller NP, Rodrigues F,  
537 Goldman GH, Rokas A. 2017. Drivers of genetic diversity in secondary metabolic  
538 gene clusters within a fungal species. *PLOS Biol* 15:e2003583.
- 539 40. Mayorga ME, Timberlake WE. 1992. The developmentally regulated *Aspergillus*  
540 *nidulans* *wA* gene encodes a polypeptide homologous to polyketide and fatty acid  
541 synthases. *Mol Gen Genet* 235:205–12.
- 542 41. Machanick P, Bailey TL. 2011. MEME-ChIP: motif analysis of large DNA datasets.  
543 *Bioinformatics* 27:1696–1697.
- 544 42. Grant CE, Bailey TL, Noble WS. 2011. FIMO: scanning for occurrences of a given  
545 motif. *Bioinformatics* 27:1017–1018.
- 546 43. Timberlake WE. 1990. Molecular genetics of *Aspergillus* development. *Annu Rev*  
547 *Genet* 24:5–36.
- 548 44. Ahmed YL, Gerke J, Park H-S, Bayram Ö, Neumann P, Ni M, Dickmanns A, Kim SC,  
549 Yu J-H, Braus GH, Ficner R. 2013. The Velvet family of fungal regulators contains a  
550 DNA-binding domain structurally similar to NF- $\kappa$ B. *PLoS Biol* 11:e1001750.
- 551 45. Park H-S, Ni M, Jeong KC, Kim YH, Yu J-H. 2012. The role, interaction and  
552 regulation of the Velvet regulator VelB in *Aspergillus nidulans*. *PLoS One* 7:e45935.
- 553 46. Sarikaya Bayram Ö, Bayram Ö, Valerius O, Park HS, Irniger S, Gerke J, Ni M, Han  
554 K-H, Yu J-H, Braus GH. 2010. LaeA control of Velvet family regulatory proteins for  
555 light-dependent development and fungal cell-type specificity. *PLoS Genet* 6:e1001226.
- 556 47. Park H-S, Yu YM, Lee M-K, Maeng PJ, Kim SC, Yu J-H. 2015. Velvet-mediated  
557 repression of  $\beta$ -glucan synthesis in *Aspergillus nidulans* spores. *Sci Rep* 5:10199.
- 558 48. Ni M, Yu J-H. 2007. A novel regulator couples sporogenesis and trehalose biogenesis  
559 in *Aspergillus nidulans*. *PLoS One* 2:e970.
- 560 49. Bayry J, Beaussar tA, Dufrene YF, Sharma M, Bansal K, Kniemeyer O, Aïmanianda  
561 V, Brakhage AA, Kaveri SV., Kwon-Chung KJ, Latge J-P, Beauvais A. 2014. Surface  
562 structure characterization of *Aspergillus fumigatus* conidia mutated in the melanin  
563 synthesis pathway and their human cellular immune response. *Infect Immun* 82:3141–  
564 3153.

- 565 50. Tsai HF, Wheeler MH, Chang YC, Kwon-Chung KJ. 1999. A developmentally  
566 regulated gene cluster involved in conidial pigment biosynthesis in *Aspergillus*  
567 *fumigatus*. *J Bacteriol* 181:6469–77.
- 568 51. Brown SJ, Kellett PJ, Lippard SJ. 1993. Ixr1, a yeast protein that binds to platinated  
569 DNA and confers sensitivity to cisplatin. *Science* 261:603–5.
- 570 52. Coornaert D, Vissers S, André B. 1991. The pleiotropic UGA35(DURL) regulatory  
571 gene of *Saccharomyces cerevisiae*: cloning, sequence and identity with the DAL81  
572 gene. *Gene* 97:163–71.
- 573 53. Friden P, Schimmel P. 1987. LEU3 of *Saccharomyces cerevisiae* encodes a factor for  
574 control of RNA levels of a group of leucine-specific genes. *Mol Cell Biol* 7:2708–17.
- 575 54. Käfer E. 1977. Meiotic and mitotic recombination in *Aspergillus* and its chromosomal  
576 aberrations. *Adv Genet* 19:33–131.
- 577 55. Seo J-A, Guan Y, Yu J-H. 2003. Suppressor mutations bypass the requirement of *fluG*  
578 for asexual sporulation and sterigmatocystin production in *Aspergillus nidulans*.  
579 *Genetics* 165:1083–1093.
- 580 56. Shaaban MI, Bok JW, Lauer C, Keller NP. 2010. Suppressor mutagenesis identifies a  
581 velvet complex remediator of *Aspergillus nidulans* secondary metabolism. *Eukaryot*  
582 *Cell* 9:1816–1824.
- 583 57. Yu J-H, Hamari Z, Han KH, Seo JA, Reyes-Dominguez Y, Scazzocchio C. 2004.  
584 Double-joint PCR: a PCR-based molecular tool for gene manipulations in filamentous  
585 fungi. *Fungal Genet Biol* 41:973–981.
- 586 58. Han KH, Seo JA, Yu J-H. 2004. Regulators of G-protein signalling in *Aspergillus*  
587 *nidulans*: RgsA downregulates stress response and stimulates asexual sporulation  
588 through attenuation of GanB (Galpha) signalling. *Mol Microbiol* 53:529–540.
- 589 59. Andrews S. 2010. FastQC: a quality control tool for high throughput sequence data.
- 590 60. Stajich JE, Harris T, Brunk BP, Brestelli J, Fischer S, Harb OS, Kissinger JC, Li W,  
591 Nayak V, Pinney DF, Stoeckert CJ, Roos DS. 2012. FungiDB: an integrated functional  
592 genomics database for fungi. *Nucleic Acids Res* 40:D675–D681.
- 593 61. Kim D, Pertea G, Trapnell C, Pimentel H, Kelley R, Salzberg SL. 2013. TopHat2:  
594 accurate alignment of transcriptomes in the presence of insertions, deletions and gene  
595 fusions. *Genome Biol* 14:R36.
- 596 62. Anders S, Pyl PT, Huber W. 2015. HTSeq--a Python framework to work with high-  
597 throughput sequencing data. *Bioinformatics* 31:166–169.
- 598 63. Love MI, Huber W, Anders S. 2014. Moderated estimation of fold change and  
599 dispersion for RNA-seq data with DESeq2. *Genome Biol* 15:550.
- 600 64. Supek F, Bošnjak M, Škunca N, Šmuc T. 2011. REVIGO summarizes and visualizes  
601 long lists of Gene Ontology Terms. *PLoS One* 6:e21800.
- 602 65. Park HS, Yu J-H. 2012. Multi-Copy Genetic Screen in *Aspergillus nidulans*, p. 183–

- 603 190. *In* Keller, NP, Turner, G (eds.), Fungal Secondary Metabolism. Humana Press,  
604 Totowa, NJ.
- 605 66. Bolger AM, Lohse M, Usadel B. 2014. Trimmomatic: a flexible trimmer for Illumina  
606 sequence data. *Bioinformatics* 30:2114–2120.
- 607 67. Li H. 2013. Aligning sequence reads, clone sequences and assembly contigs with  
608 BWA-MEM.
- 609 68. Li H, Handsaker B, Wysoker A, Fennell T, Ruan J, Homer N, Marth G, Abecasis G,  
610 Durbin R, 1000 Genome Project Data Processing Subgroup. 2009. The Sequence  
611 Alignment/Map format and SAMtools. *Bioinformatics* 25:2078–2079.
- 612 69. Zhang Y, Liu T, Meyer CA, Eeckhoute J, Johnson DS, Bernstein BE, Nussbaum C,  
613 Myers RM, Brown M, Li W, Liu XS. 2008. Model-based Analysis of ChIP-Seq  
614 (MACS). *Genome Biol* 9:R137.
- 615 70. Landt SG, Marinov GK, Kundaje A, Kheradpour P, Pauli F, Batzoglou S, Bernstein  
616 BE, Bickel P, Brown JB, Cayting P, Chen Y, DeSalvo G, Epstein C, Fisher-Aylor KI,  
617 Euskirchen G, Gerstein M, Gertz J, Hartemink AJ, Hoffman MM, Iyer VR, Jung YL,  
618 Karmakar S, Kellis M, Kharchenko PV, Li Q, Liu T, Liu XS, Ma L, Milosavljevic A,  
619 Myers RM, Park PJ, Pazin MJ, Perry MD, Raha D, Reddy TE, Rozowsky J, Shores  
620 N, Sidow A, Slattery M, Stamatoyannopoulos JA, Tolstorukov MY, White KP, Xi S,  
621 Farnham PJ, Lieb JD, Wold BJ, Snyder M. 2012. ChIP-seq guidelines and practices of  
622 the ENCODE and modENCODE consortia. *Genome Res* 22:1813–31.
- 623 71. Kharchenko PV, Tolstorukov MY, Park PJ. 2008. Design and analysis of ChIP-seq  
624 experiments for DNA-binding proteins. *Nat Biotechnol* 26:1351–1359.
- 625 72. Quinlan AR, Halli M. 2010. BEDTools: a flexible suite of utilities for comparing  
626 genomic features. *Bioinformatics* 26:841–2.

627

## 628 **Figure Legends**

### 629 **Fig 1 The central regulatory pathway of *Aspergillus* conidiation**

630 (A) A cartoon depiction of genetic interactions of the central regulators in *A. nidulans*  
631 conidiogenesis. The central regulators cooperatively activate the conidiation-specific genes  
632 responsible for the morphogenesis of conidiophores. (B) The predicted protein architectures  
633 for the three conserved central regulators of conidiation in *A. nidulans*, *A. fumigatus*, and *A.*  
634 *flavus*. The blue box and the red hexagon represents the C2H2 zinc finger domain and  
635 TEA/ATTS domain in BrlA and AbaA, respectively, and were identified in a blastP (version  
636 2.6.0) search (35). The red circle represents a putative transcription activation domain (TAD),  
637 which was predicted by 9aaTAD using the “Less stringent Pattern” setting (31). The blue  
638 diamond represents the nuclear localization signal (NLS) predicted by NLStradamus using the  
639 4 state HMM static model (32). The orange rectangle represents the ESC1/WetA-related  
640 domain (PTHR22934) predicted by the PANTHER classification system (36).

### 641 **Fig 2 Overview of the WetA-regulated-orthologs in *A. nidulans*, *A. fumigatus*, and *A.***

#### 642 *flavus*

643 The 6,466 genes belonging to an orthogroup that possessed at least one member from *A.*  
644 *nidulans*, *A. fumigatus*, and *A. flavus* are represented by the black arcs next to their respective  
645 species labels. Gray, orthologs whose expression did not change between  $\Delta wetA$  and WT  
646 conidia. Green, orthologs that were differentially expressed in only one species. Blue, genes  
647 that showed the same differential expression pattern in two out of the three species. Red, genes  
648 that showed the same differential expression pattern in all three species. Orange, genes that  
649 showed a divergent differential pattern in two or more species. Lines connect expressed genes  
650 from the same orthogroup.



651 **Fig 3 WetA-mediated regulation of asexual development in the three *Aspergillus* species**

652 Schematic diagram of the WetA-mediated regulatory model of conidiation. Genes with  
653 increased, decreased, and unaffected mRNA levels in the  $\Delta wetA$  conidia are labeled with red  
654 (WetA-inhibited), blue (WetA-activated), and grey (not affected by WetA) circles and the  
655 WetA-regulatory effects in the  $\Delta AniwetA$ ,  $\Delta AfuwetA$ , and  $\Delta AflwetA$  conidia are listed under the  
656 gene name from left to right, respectively. There are two orthologs of *fphA* in *A. fumigatus*, one  
657 of which is WetA-inhibited and the other is not regulated by WetA.

658 **Fig 4 WetA-regulatory effects on trehalose, chitin,  $\beta$ -(1,3)-glucan, and  $\alpha$ -(1,3)-glucan**  
659 **metabolism in *Aspergillus* species**

660 **Fig 5 WetA-regulatory effects on DHN-melanin, pyomelanin, and hydrophobin**  
661 **biosynthesis in *Aspergillus* species**

662 In summary, our RNA-seq analyses suggest that WetA exerts broad regulatory effects in  
663 conidiation by controlling about half of the transcriptome in each of the three *Aspergillus*  
664 species we tested. Even though WetA-mediated regulation results in similar phenotypes and  
665 pathways being regulated across the three species, the nature of that regulation is different when  
666 comparing individually regulated genes among the species. These results suggest that, although  
667 the WetA-mediated GRNs have diverged during the evolution of *Aspergillus*, their regulatory  
668 logic appears to have remained conserved.

669 **Fig 6 Overlap between DEGs and WRE-containing genes in three *Aspergillus* species.**

670 The percentages of genes differentially expressed in the  $\Delta wetA$  conidia (DEG), the percentage  
671 of genes that contain predicted WRE sequences in their upstream 1.5 kb regions (WRE), and  
672 the DEGs with a WRE in their upstream 1.5 kb regions (DEG w/ WRE) are shown. The *A.*

673 *nidulans*, *A. fumigatus*, and *A. flavus* genes are shown in light green, light blue, and light orange,  
674 respectively.

675 **Fig 7 WRE occurrences in the upstream regions of *wetA* orthologs in representative**  
676 **fungi**

677 WRE occurrences were identified in a series of regions located upstream of *wetA* orthologs.  
678 Numbers to the left of the sequence indicate at what position relative to the translation start site  
679 the sequence shown begins. The sequences shown are from 15 bp upstream of the WRE  
680 occurrence that was identified by FIMO (42) with the lowest p-value, to 14 bp downstream of  
681 the WRE occurrence. Bases are colored black if they are conserved in at least 60% of the  
682 species. Green – Aspergillaceae. Orange – Trichocomaceae. Blue – Onygenales. Purple –  
683 Sordariomycete. (RC) – Reverse Complement.

684 **Fig 8 Proposed model of the rewired WetA-mediated GRNs in *Aspergilli***

685 We propose that WetA-mediated GRNs have been rewired during the evolution of *Aspergillus*  
686 species but that their regulatory logic (i.e., their regulation of chemical development, cellular  
687 development, and other biological processes) remains conserved. Red circle: WetA. Blue circle:  
688 Targets that are consistently up-/down-regulated by WetA. Yellow circle: Targets that are  
689 divergently regulated by WetA. Grey circle: Targets that are not regulated by WetA.

690

691 **Table 1 The roles of WetA in three *Aspergillus* species**

|                                                                           | $\Delta AniwetA$ | $\Delta AfuwetA$ | $\Delta AflwetA$ |
|---------------------------------------------------------------------------|------------------|------------------|------------------|
| <b>Conidia</b>                                                            |                  |                  |                  |
| Colorless and autolyzed conidia<br>(8, 10–13, 20–22, 26, 30)              | +                | +                | +                |
| Reduced conidia size<br>(8)                                               | +                | +                | +                |
| Disrupted conidial wall structure<br>(8, 20, 21, 30, 37)                  | +                | +                | +                |
| Disrupted C2 layer thickness<br>(8, 30)                                   | Thicker          | Thicker          | Thinner          |
| Reduced viability & stress tolerance<br>(8, 30)                           | +                | +                | +                |
| Reduced trehalose amount<br>M-Y Wu and J-H Yu unpublished data, (8, 30)   | +                | +                | +                |
| Increased $\beta$ -(1,3)-glucan amount<br>(30)                            | +                | NA               | +                |
| Reduced light-dependent conidiation<br>(30)                               | NA               | NA               | +                |
| Disrupted conidiation time<br>M-Y Wu and J-H Yu unpublished data, (8, 30) | -                | Postponed        | Advanced         |
| <b>Hyphae</b>                                                             |                  |                  |                  |
| Reduced hyphal growth rate<br>M-Y Wu and J-H Yu unpublished data, (8, 30) | +                | +                | +                |
| Higher branching rate<br>M-Y Wu and J-H Yu unpublished data, (8, 30)      | +                | +                | +                |
| Reduced aflatoxin production<br>(30)                                      | NA               | NA               | +                |

692 NA: not applicable

693

694 **Table 2 Summary of DEGs in the three *Aspergillus*  $\Delta wetA$  conidia**

|                                 | <i>A. nidulans</i> | <i>A. fumigatus</i> | <i>A. flavus</i>   |
|---------------------------------|--------------------|---------------------|--------------------|
| Unaffected genes                | 5,246 (48%)        | 4,374 (43%)         | 7,730 (57%)        |
| <b>DEG</b>                      | <b>5,742 (52%)</b> | <b>5,756 (57%)</b>  | <b>5,755 (43%)</b> |
| Overexpressed in $\Delta wetA$  | 3,107 (28%)        | 2,996 (30%)         | 2,899 (21%)        |
| Underexpressed in $\Delta wetA$ | 2,635 (24%)        | 2,758 (27%)         | 2,856 (21%)        |
| <b>Total</b>                    | <b>10,988</b>      | <b>10,130</b>       | <b>13,485</b>      |

695

696

697 **Table 3 WetA-mediated SMG regulation**

|                                                                           | <i>A. nidulans</i> | <i>A. fumigatus</i> | <i>A. flavus</i> |
|---------------------------------------------------------------------------|--------------------|---------------------|------------------|
| <b>Total cluster number</b>                                               | 67                 | 33                  | 74               |
| <b>Clusters with at least one WetA-regulated gene</b>                     | 64 (96%)           | 33 (100%)           | 68 (92%)         |
|                                                                           | 3 (4%)             | 0 (0%)              | 6 (8%)           |
|                                                                           | Cluster 41         |                     | Cluster 2        |
| <b>Clusters not regulated by WetA</b>                                     | Cluster 56         |                     | Cluster 5        |
|                                                                           | Cluster 63         |                     | Cluster 14       |
|                                                                           |                    |                     | Cluster 19       |
|                                                                           |                    |                     | Cluster 38       |
|                                                                           |                    |                     | Cluster 68       |
|                                                                           | 5 (7%)             | 8 (24%)             | 8 (11%)          |
|                                                                           | Emericellamide     | Ferricrocin         | Cluster 23       |
|                                                                           | Terriquinone       | DHN Melanin         | Cluster 35       |
| <b>Clusters where every gene was regulated by WetA</b>                    | Cluster 26         | Fumigaclavine       | Cluster 41       |
|                                                                           | Cluster 37         | Endocrocin          | Cluster 46       |
|                                                                           | Cluster 60         | Helvolic Acid       | Cluster 48       |
|                                                                           |                    | Fumisoquin          | Cluster 52       |
|                                                                           |                    | Fumiquinazolines    | Cluster 54       |
|                                                                           |                    | Cluster 31          | Cluster 71       |
|                                                                           | 2 (3%)             | 6 (18%)             | 1 (1%)           |
|                                                                           | Emericellamide     | Ferricrocin         | Cluster 71       |
|                                                                           | Terriquinone       | DHN Melanin         |                  |
| <b>Whole cluster is upregulated in <math>\Delta wetA</math> conidia</b>   | Cluster 26         | Endocrocin          |                  |
|                                                                           |                    | Helvolic Acid       |                  |
|                                                                           |                    | Fumisoquin          |                  |
|                                                                           |                    | Fumiquinazolines    |                  |
| <b>Whole cluster is downregulated in <math>\Delta wetA</math> conidia</b> | 0 (0%)             | 1 (3%)              | 2 (3%)           |
|                                                                           |                    | Cluster 31          | Cluster 23       |
|                                                                           |                    |                     | Cluster 52       |

698

699

700 **Table 4 WetA targeted DEGs in  $\Delta AniwetA$  conidia**

|                            |                                                                                                                                                                         |
|----------------------------|-------------------------------------------------------------------------------------------------------------------------------------------------------------------------|
| <b>G-protein pathway</b>   | <i>gprC, nopA</i>                                                                                                                                                       |
| <b>Conidial integrity</b>  | <i>tppC, ccg-9, tpsC, treA, chsA, chiA, btgD, eglC, engA, btgC, eng7, bglA, ags2, agnD, agnC, hmgX, hppD, maiA, dewA, AN0499, AN1069, AN1837</i>                        |
| <b>Kinase</b>              | <i>rio2, aromA, nimO, isr1, teaR, pho80, ffkA, panK, nimX, AN3619, AN8213, AN8843, AN10188, AN10551</i>                                                                 |
| <b>TF</b>                  | <i>fcr1, aflR, dbaA, cpcA, vosA, mdpE, wetA, zapA, AN6295, AN1217, AN0817, AN3502, AN3769, AN0094, AN4773, AN6790, AN8111, AN8355, AN8949, AN11169, AN0388, AN10550</i> |
| <b>SMG backbones</b>       | <i>apdA, inpB, AN0016, AN1242, AN9129</i>                                                                                                                               |
| <b>Asexual development</b> | <i>ams1, chsB, cnaB, cpcB, dewA, gprC, odeA, tpsC, velB, wetA, wsc1</i>                                                                                                 |

701

702

703 **Table 5 Conserved DEGs with a WRE in *Aspergilli***

|                                                               | <i>A. nidulans ID</i> | <i>A. flavus ID</i> | <i>A. fumigatus ID</i> |
|---------------------------------------------------------------|-----------------------|---------------------|------------------------|
| <b>Up-regulated<br/>in <math>\Delta wetA</math> conidia</b>   | AN1156                | AFLA_068310         | Afu1g11450             |
|                                                               | AN10598               | AFLA_101220         | Afu3g07020             |
|                                                               | AN6088                | AFLA_045760         | Afu2g09282             |
|                                                               | AN4836                | AFLA_102180         | Afu3g07290             |
|                                                               | AN3752                | AFLA_073850         | Afu7g04580             |
| <b>Down-regulated<br/>in <math>\Delta wetA</math> conidia</b> | AN4464                | AFLA_112150         | Afu4g07690             |
|                                                               | AN1524                | AFLA_078640         | Afu8g05330             |
|                                                               | AN5715                | AFLA_127800         | Afu1g06770             |
|                                                               | AN10265               | AFLA_014960         | Afu2g15910             |
|                                                               | AN10551               | AFLA_112710         | Afu4g07140             |
|                                                               | AN5215                | AFLA_087840         | Afu6g07490             |
|                                                               | AN8763                | AFLA_131750         | Afu6g02960             |
|                                                               | AN9037                | AFLA_023560         | Afu3g15190             |
|                                                               | AN4716                | AFLA_091920         | Afu5g08580             |
|                                                               | AN1937                | AFLA_052030         | Afu4g13230             |

704

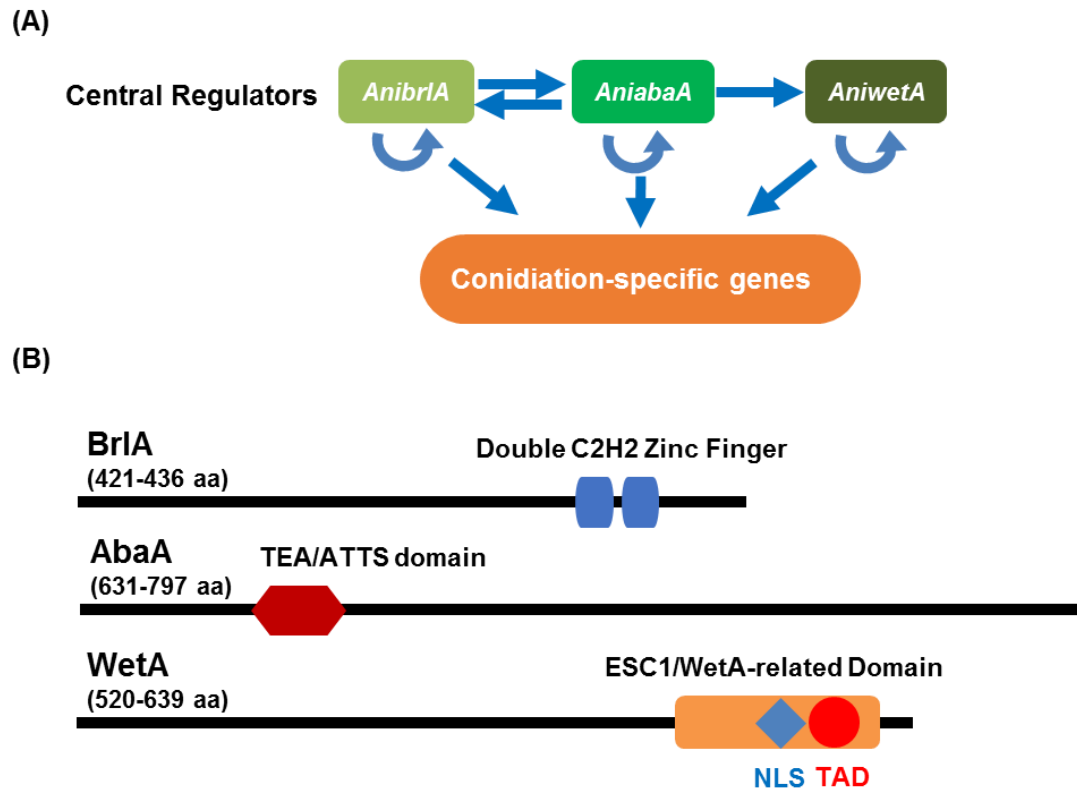

**Fig 1 The central regulatory pathway of *Aspergillus* conidiation**

(A) A cartoon depiction of genetic interactions of the central regulators in *A. nidulans* conidiogenesis. The central regulators cooperatively activate the conidiation-specific genes responsible for the morphogenesis of conidiophores. (B) The predicted protein architectures for the three conserved central regulators of conidiation in *A. nidulans*, *A. fumigatus*, and *A. flavus*. The blue box and the red hexagon represents the C2H2 zinc finger domain and TEA/ATTS domain in BrlA and AbaA, respectively, and were identified in a blastP (version 2.6.0) search (35). The red circle represents a putative transcription activation domain (TAD), which was predicted by 9aaTAD using the “Less stringent Pattern” setting (31). The blue diamond represents the nuclear localization signal (NLS) predicted by NLStradamus using the 4 state HMM static model (32). The orange rectangle represents the ESC1/WetA-related domain (PTHR22934) predicted by the PANTHER classification system (36).



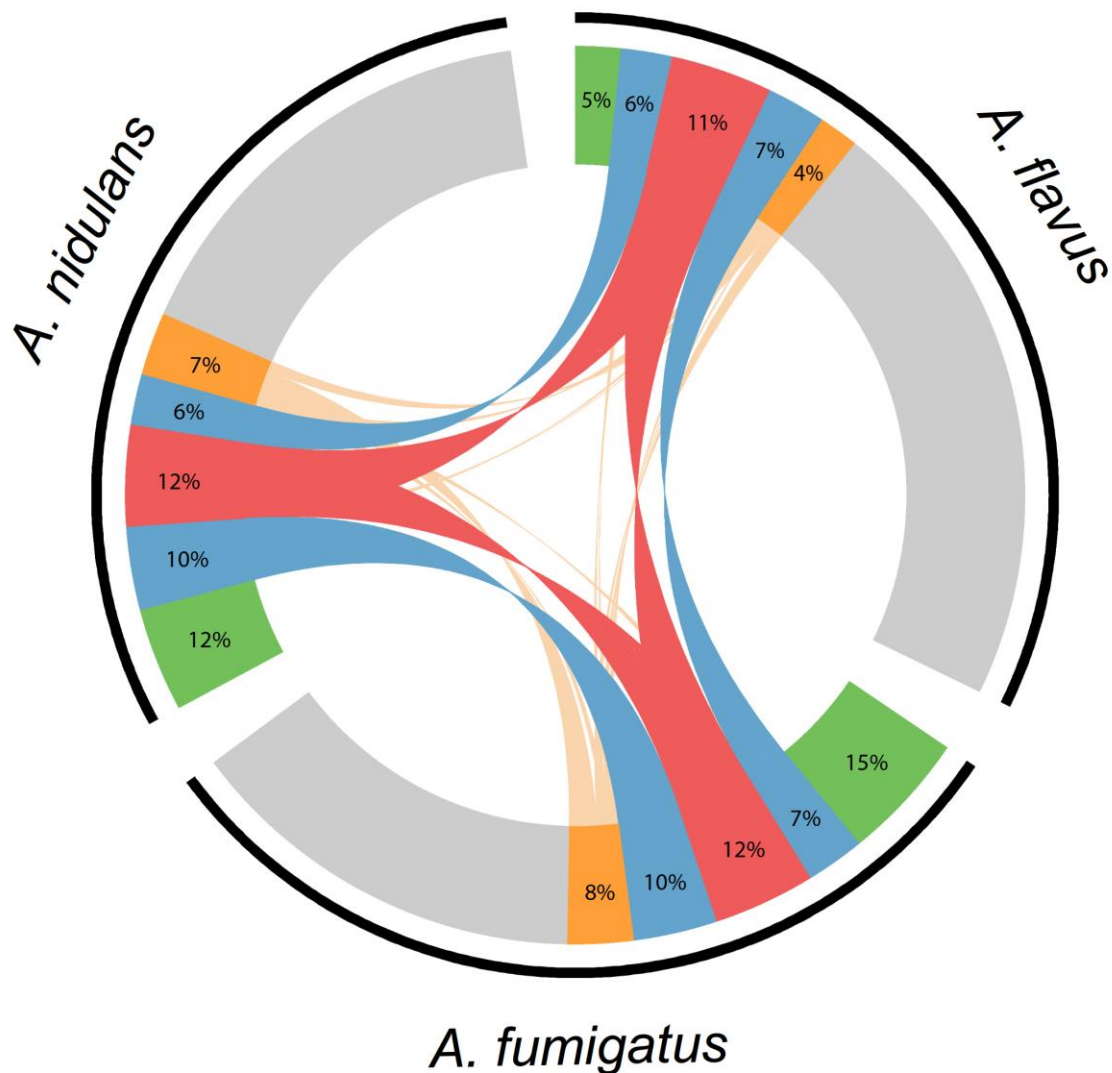

**Fig 2 Overview of the WetA-regulated-orthologs in *A. nidulans*, *A. fumigatus*, and *A.***

***flavus***

The 6,466 genes belonging to an orthogroup that possessed at least one member from *A. nidulans*, *A. fumigatus*, and *A. flavus* are represented by the black arcs next to their respective species labels. Gray, orthologs whose expression did not change between  $\Delta wetA$  and WT conidia. Green, orthologs that were differentially expressed in only one species. Blue, genes that showed the same differential expression pattern in two out of the three species. Red, genes that showed the same differential expression pattern in all three species. Orange, genes that showed a divergent differential pattern in two or more species. Lines connect expressed genes from the same orthogroup.

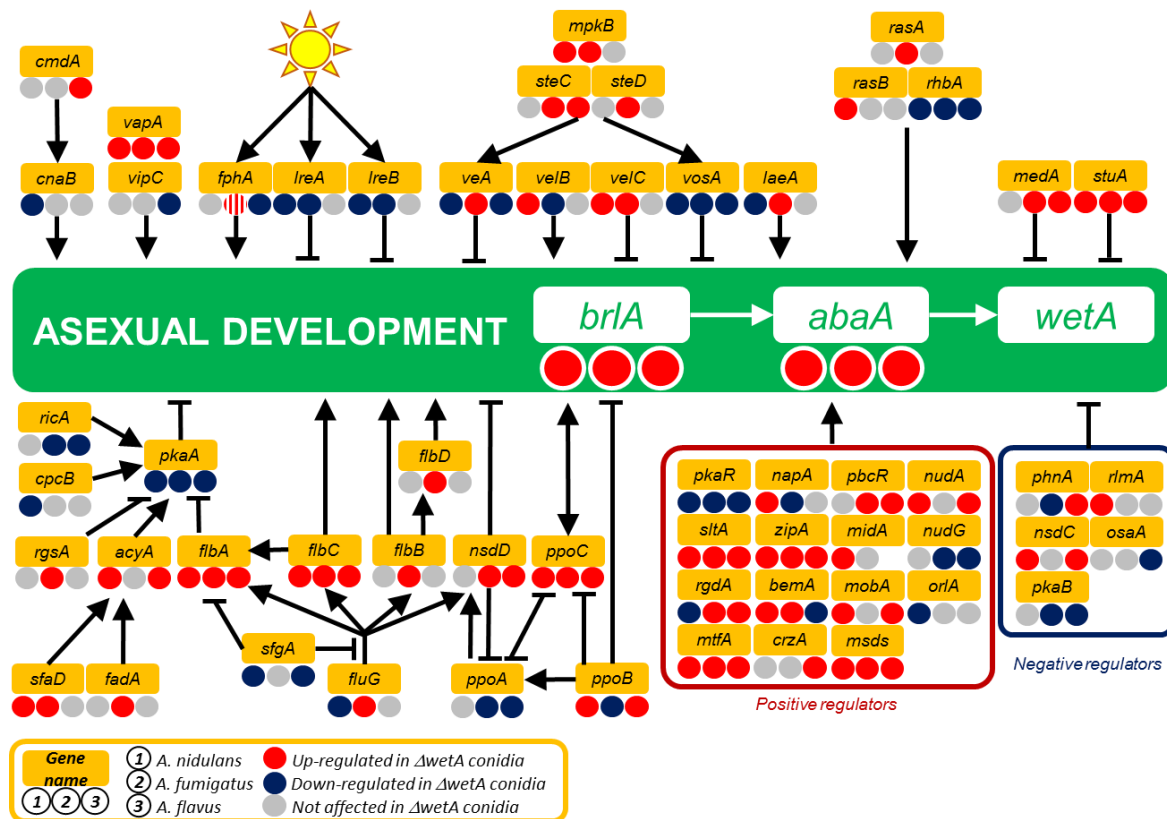

**Fig 3 WetA-mediated regulation of asexual development in the three *Aspergillus* species**

Schematic diagram of the WetA-mediated regulatory model of conidiation. Genes with increased, decreased, and unaffected mRNA levels in the  $\Delta wetA$  conidia are labeled with red (WetA-inhibited), blue (WetA-activated), and grey (not affected by WetA) circles and the WetA-regulatory effects in the  $\Delta AniwetA$ ,  $\Delta AfluwetA$ , and  $\Delta AflwetA$  conidia are listed under the gene name from left to right, respectively. There are two orthologs of *fphA* in *A. fumigatus*, one of which is WetA-inhibited and the other is not regulated by WetA.

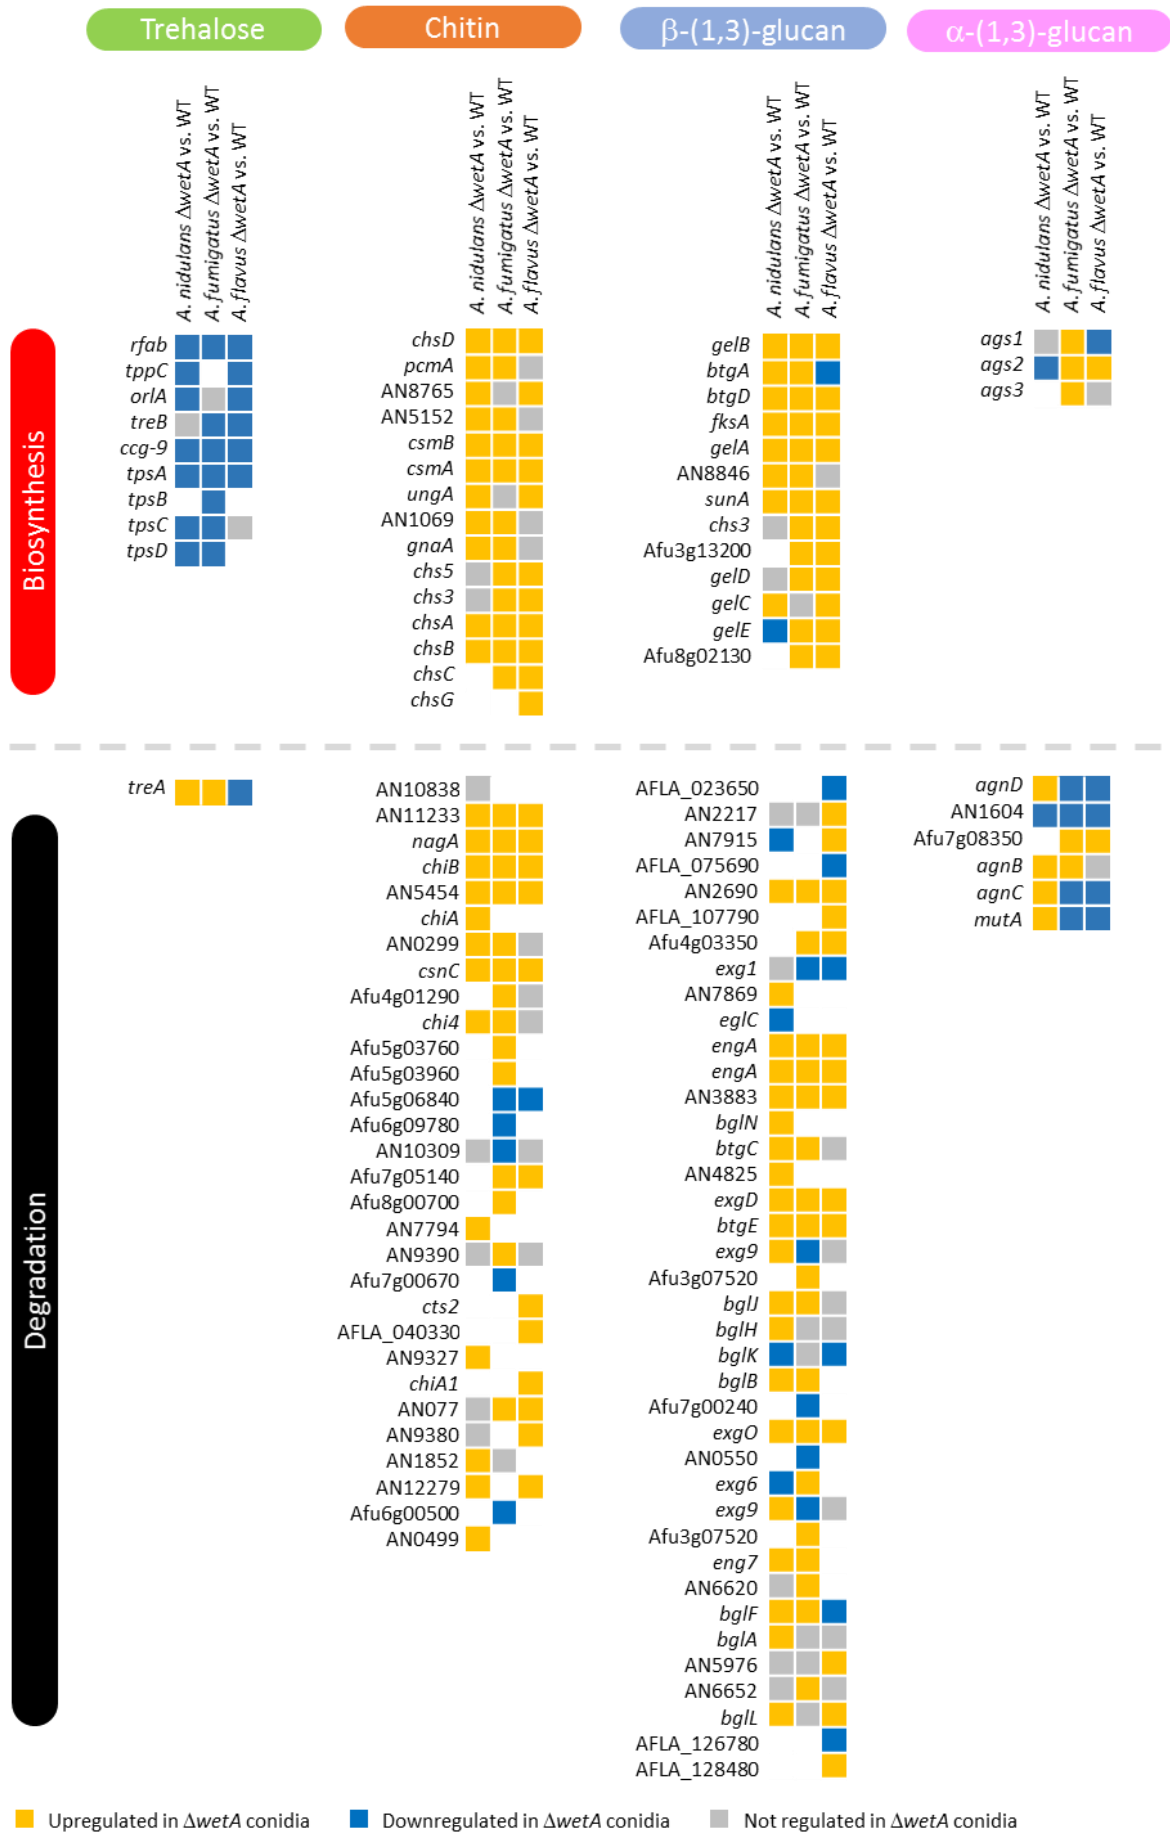

**Fig 4** WetA-regulatory effects on trehalose, chitin,  $\beta$ -(1,3)-glucan, and  $\alpha$ -(1,3)-glucan

## **metabolism in *Aspergillus* species**

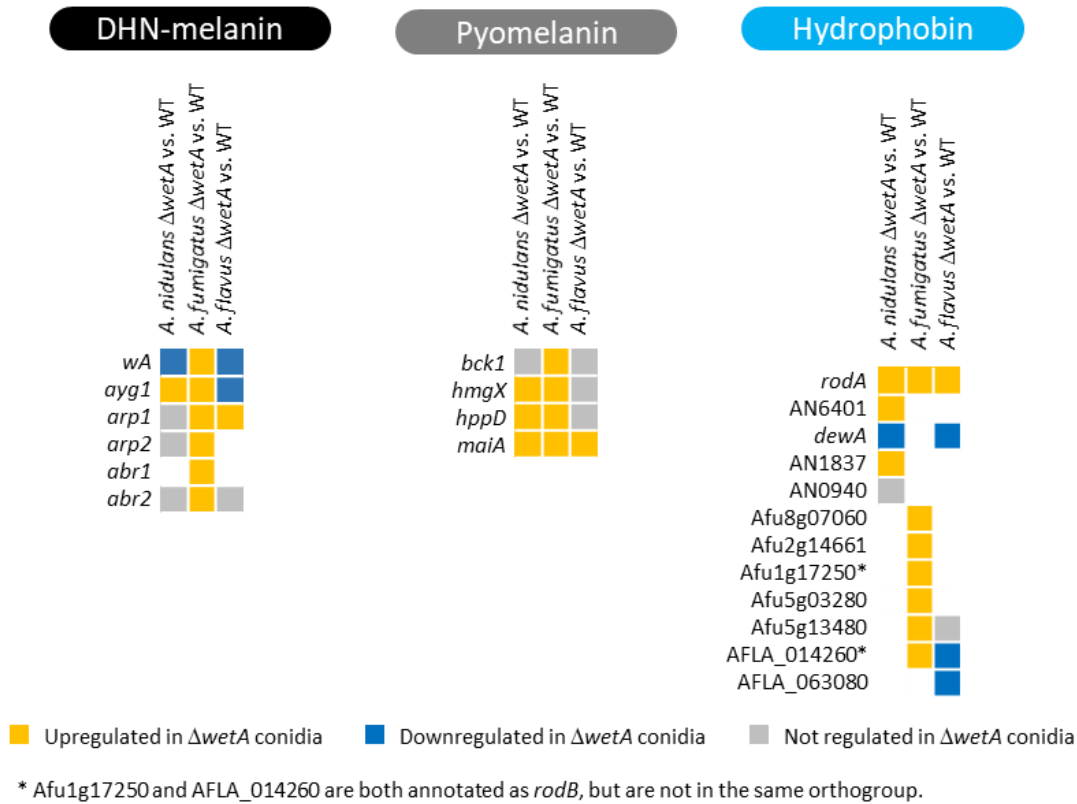

**Fig 5** WetA-regulatory effects on DHN-melanin, pyomelanin, and hydrophobin biosynthesis in *Aspergillus* species

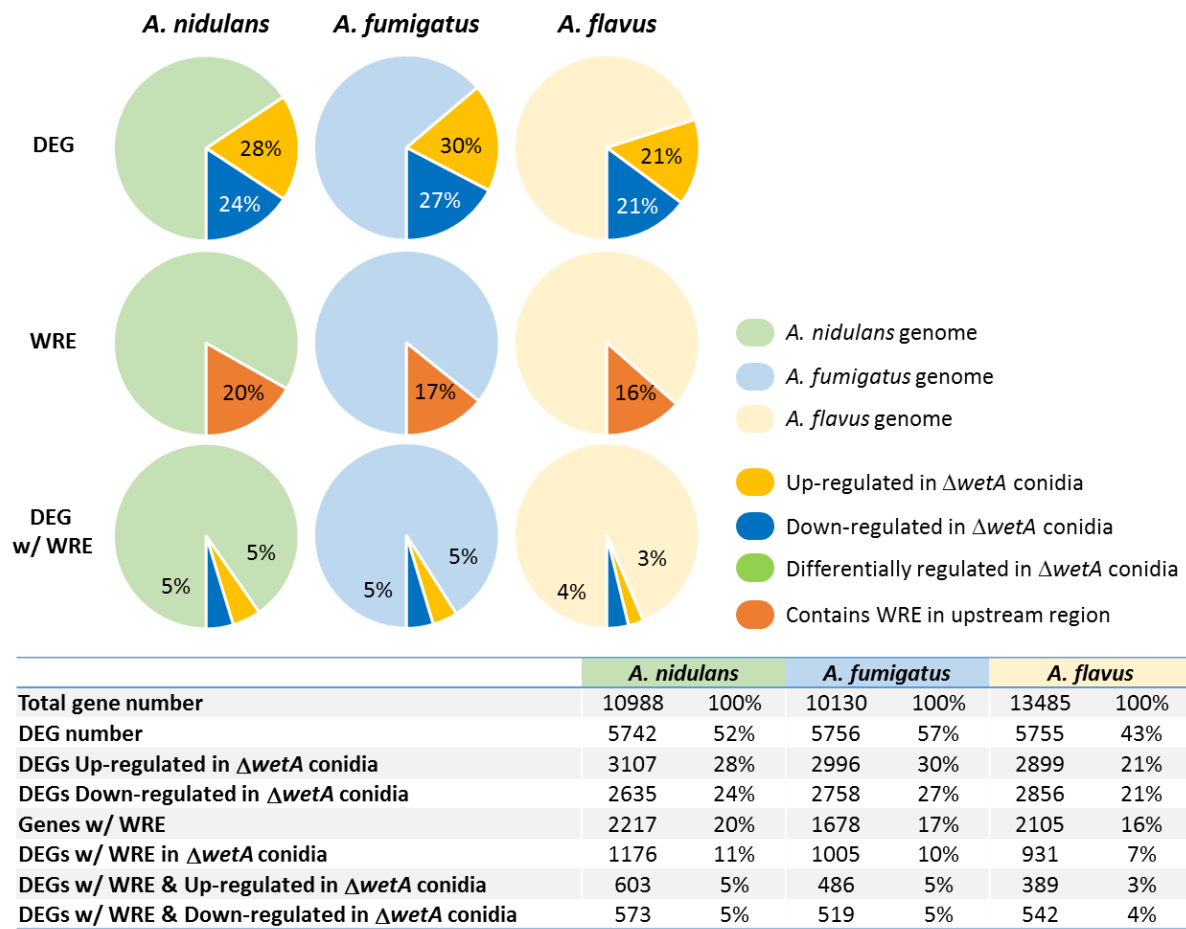

**Fig 6 Overlap between DEGs and WRE-containing genes in three *Aspergillus* species.**

The percentages of genes differentially expressed in the  $\Delta wetA$  conidia (DEG), the percentage of genes that contain predicted WRE sequences in their upstream 1.5 kb regions (WRE), and the DEGs with a WRE in their upstream 1.5 kb regions (DEG w/ WRE) are shown. The *A. nidulans*, *A. fumigatus*, and *A. flavus* genes are shown in light green, light blue, and light orange, respectively.

|                            |        |                                                            |
|----------------------------|--------|------------------------------------------------------------|
| <i>A. niger</i>            | -48    | CTACTCTGGT <b>CGTCCGCAAACGGAAA</b> CGGGCACCCCGT            |
| <i>A. nidulans</i>         | -56    | CCTCTTCCAT <b>CATCCGCAAACGGAAA</b> GGTGATCACCCG            |
| <i>A. flavus</i>           | -44    | TTGGAACCACCAT <b>CGCCGCAAACGGAAATAGAA</b> TATCCGA          |
| <i>A. oryzae</i>           | -44    | TTGGAACCACCAT <b>CGCCGCAAACGGAAATAGAA</b> TATCCGA          |
| <i>A. terreus</i> (RC)     | -41    | TGCCTCTCTTT <b>GTCTCCGCAAACGGAAA</b> GCATCTGGCAAC          |
| <i>A. fumigatus</i>        | -44    | TTCTCAGCTCTTT <b>GCCGCAAACGGAAA</b> GACAGAGCAGCC           |
| <i>A. fischeri</i>         | -101   | CTTCTCAGCTCTTT <b>GCCGCAAACGGAAA</b> GACAGAGCAGCC          |
| <i>A. clavatus</i>         | -44    | GCTCTCACAT <b>CATTGCCGCAAACGGAAA</b> GAGGACGGCAGC          |
| <i>P. chrysogenum</i>      | -33    | ACTTCTATATT <b>GTCCGCAAACGGAAAACA</b> AGATGTTCCG           |
| <i>A. zonatus</i>          | -42    | ATTAGCCGCGGAC <b>GGCCGCAAACGGAAA</b> GGAAAGCCATCA          |
| <i>T. marneffeii</i>       | -51    | GACATTTTCT <b>CTAA</b> CCAA <b>AA</b> CGGAAAACACTGCCACC    |
| <i>T. stipitatus</i>       | -1,521 | ATCCGAGGGGCT <b>CCCTGCA</b> ACATTT <b>CATG</b> ACCCAATTG   |
| <i>C. immitis</i> (RC)     | -324   | AGAAGGAAACAG <b>CTCGAA</b> ACCAG <b>AGCGG</b> ACTCTTAACA   |
| <i>P. brasiliensis</i>     | -1,224 | TAAAACGCCAGAT <b>GACCCAA</b> AGTCTCCACAGAGCAGAC            |
| <i>H. capsulatum</i> (RC)  | -210   | ACAGGGTTTTT <b>CCCGCA</b> AATGG <b>CACCTAC</b> AGGCAATGA   |
| <i>F. graminearum</i> (RC) | -1,380 | TTAGGGACGGGAG <b>CTTGCAT</b> ACAGCG <b>CATGCA</b> ACATCCCT |

**Fig 7 WRE occurrences in the upstream regions of *wetA* orthologs in representative**

### **fungi**

WRE occurrences were identified in a series of regions located upstream of *wetA* orthologs. Numbers to the left of the sequence indicate at what position relative to the translation start site the sequence shown begins. The sequences shown are from 15 bp upstream of the WRE occurrence that was identified by FIMO (42) with the lowest p-value, to 14 bp downstream of the WRE occurrence. Bases are colored black if they are conserved in at least 60% of the species. Green – Aspergillaceae. Orange – Trichocomaceae. Blue – Onygenales. Purple – Sordariomycete. (RC) – Reverse Complement.

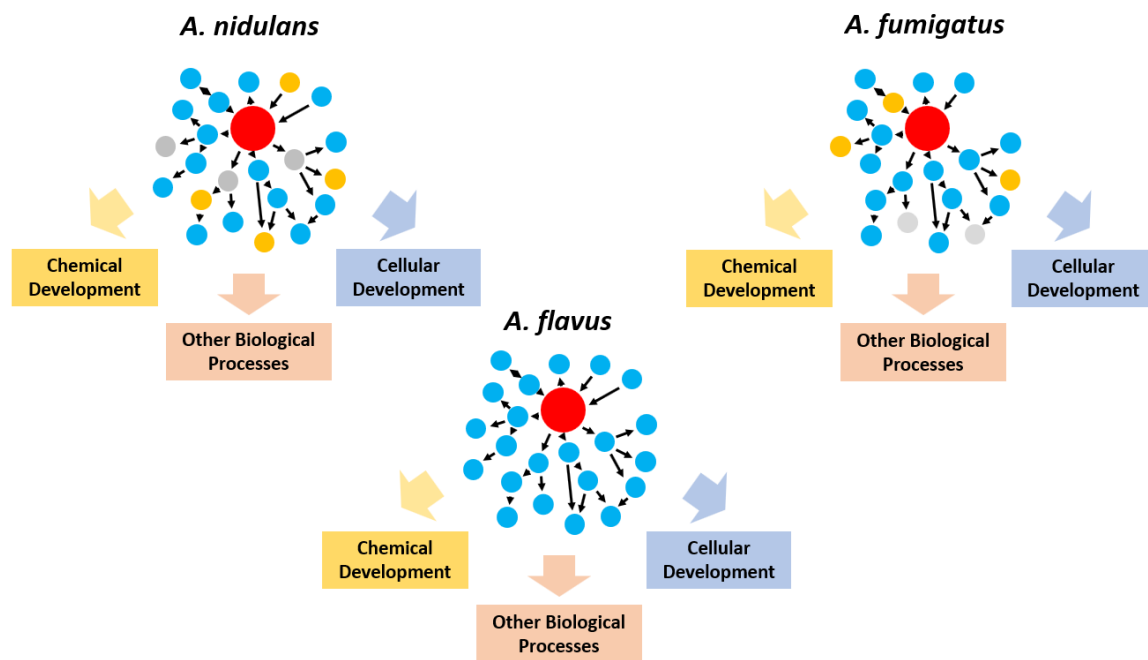

**Fig 8 Proposed model of the rewired WetA-mediated GRNs in *Aspergilli***

We propose that WetA-mediated GRNs have been rewired during the evolution of *Aspergillus* species but that their regulatory logic (i.e., their regulation of chemical development, cellular development, and other biological processes) remains conserved. Red circle: WetA. Blue circle: Targets that are consistently up-/down-regulated by WetA. Yellow circle: Targets that are divergently regulated by WetA. Grey circle: Targets that are not regulated by WetA.
